# Supplementary material
Source: ML conference proceedings conference paper supplement (https://www.ecva.net/papers/eccv_2020/papers_ECCV/html/123680613_ECCV_2020_paper.php)
Supplement: Supplementary file 3 [file 123680613-supp.zip]

Archive with 3 entries (3 files):
- 4386-supp.mp4
- 4386-supp.pdf
- __MACOSX/._4386-supp.pdf
